# Supplementary material for: N-acetylcysteine Protects Against Myocardial Ischemia–Reperfusion Injury Through Anti-ferroptosis in Type 1 Diabetic Mice
Source: PubMed Central journal article supplement (PMC11076402; doi:10.1007/s12012-024-09852-7), 2024-04-22

Whole membrane WB image for Gpx4 and Slc7a11 in Figure 1

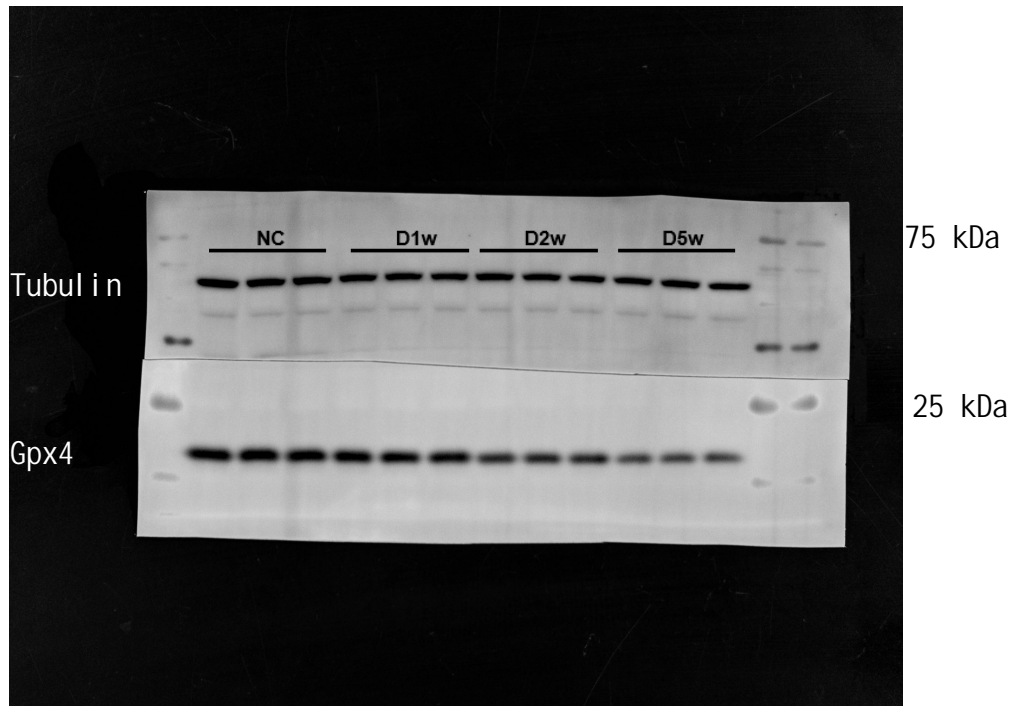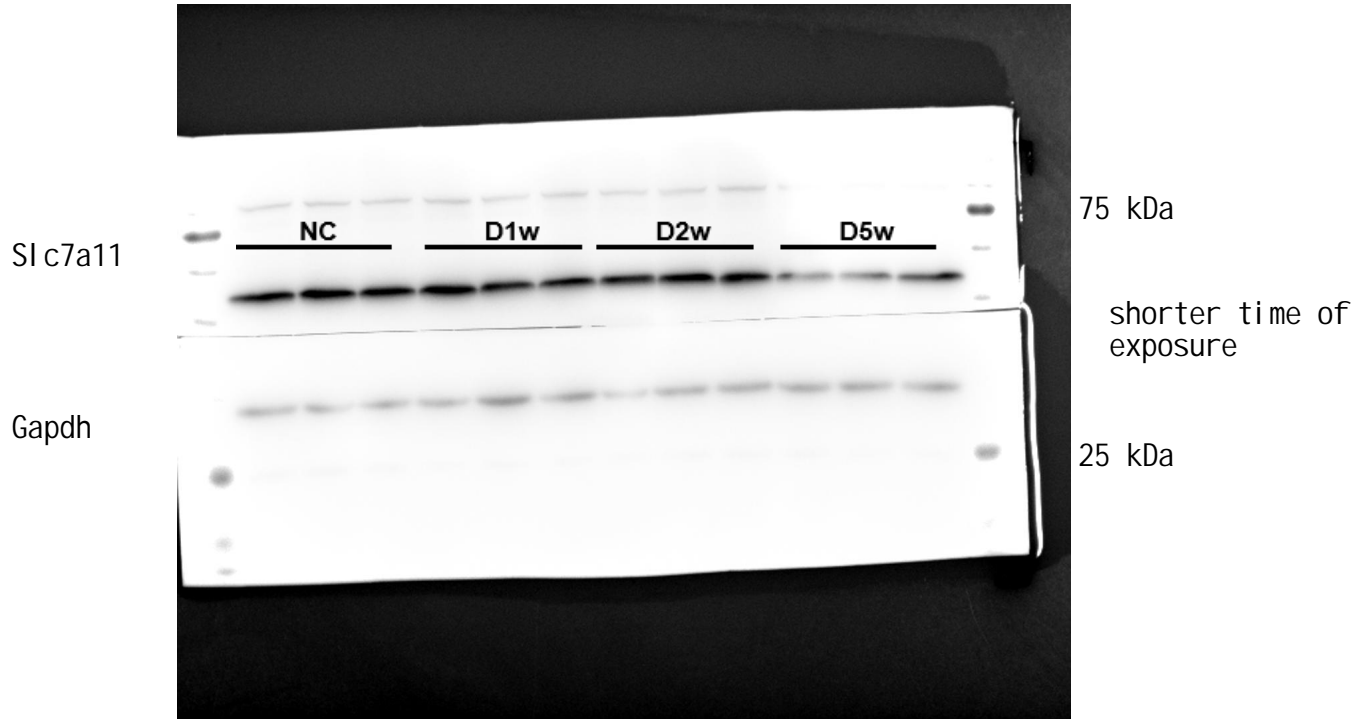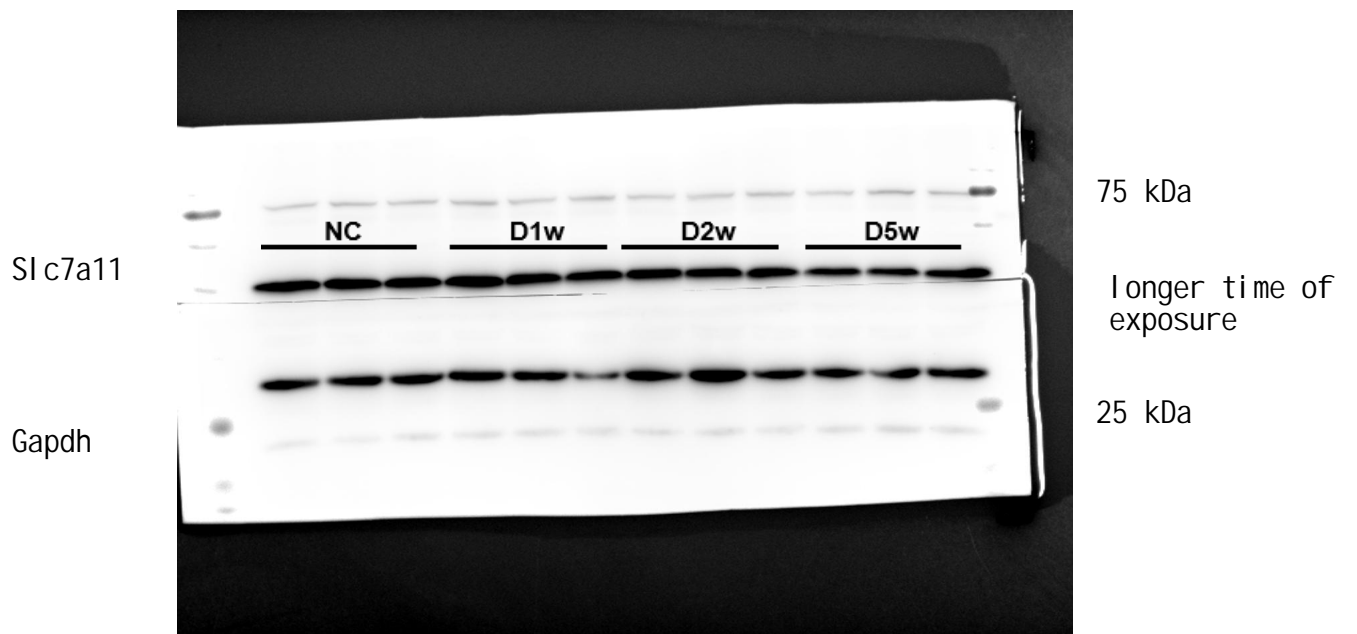

Whole membrane WB image for  
Gpx4 and Slc7a11 in Figure 2

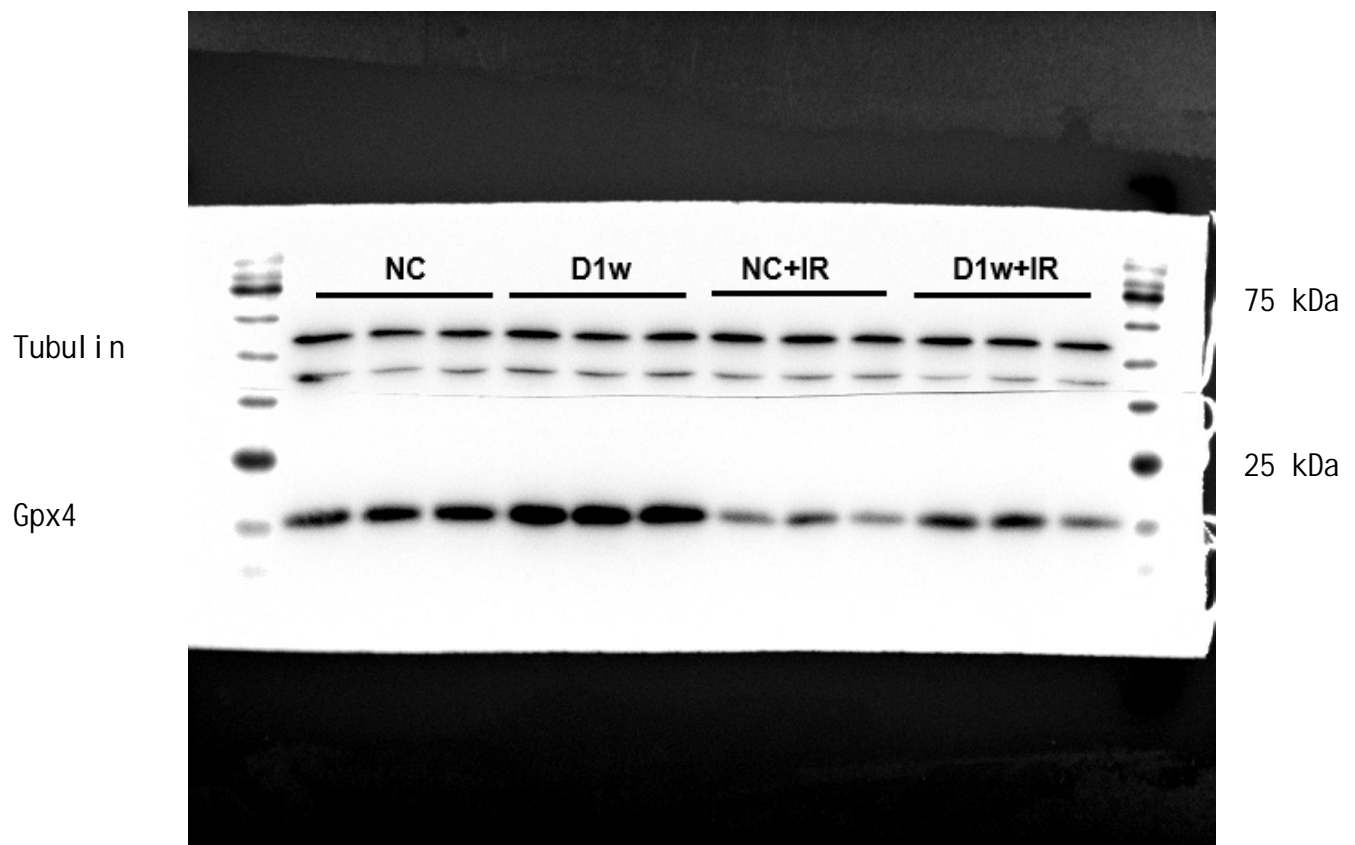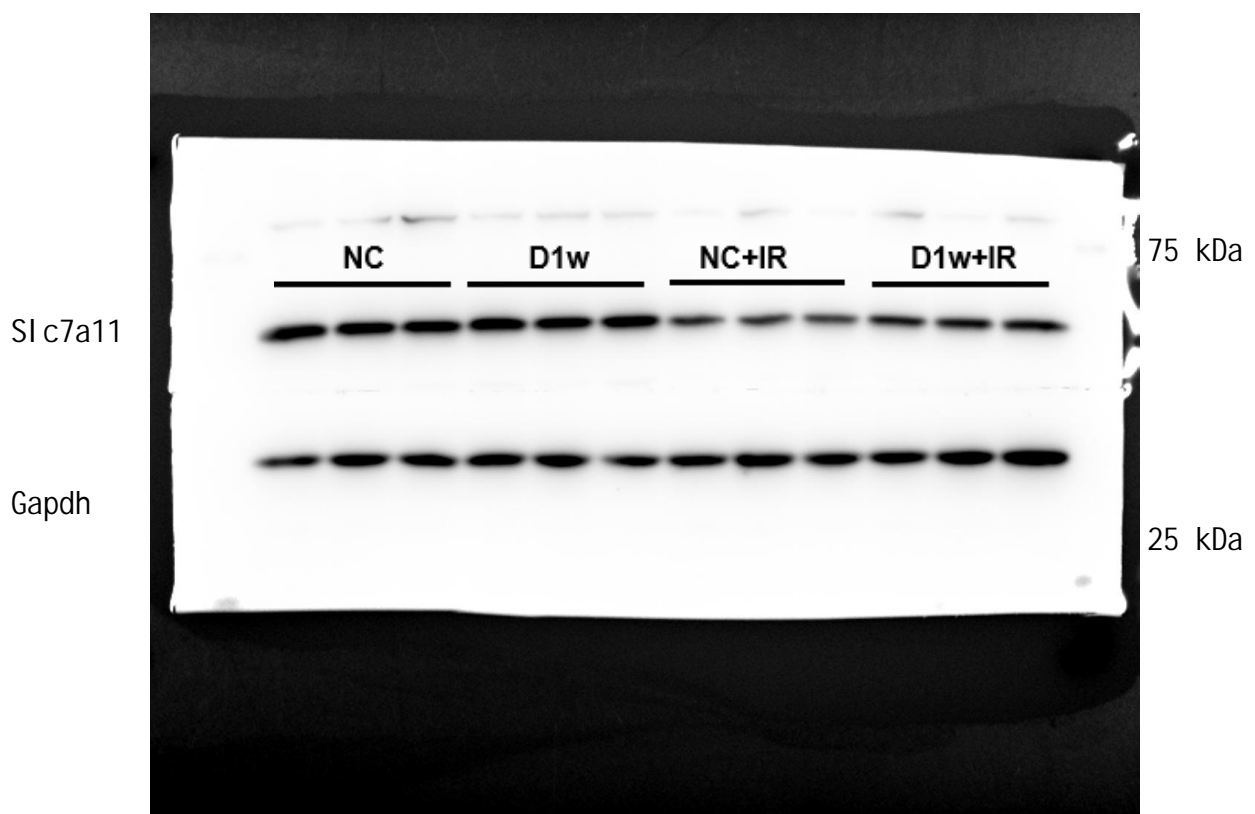

Whole membrane WB image for Gpx4 and Slc7a11 in Figure 3

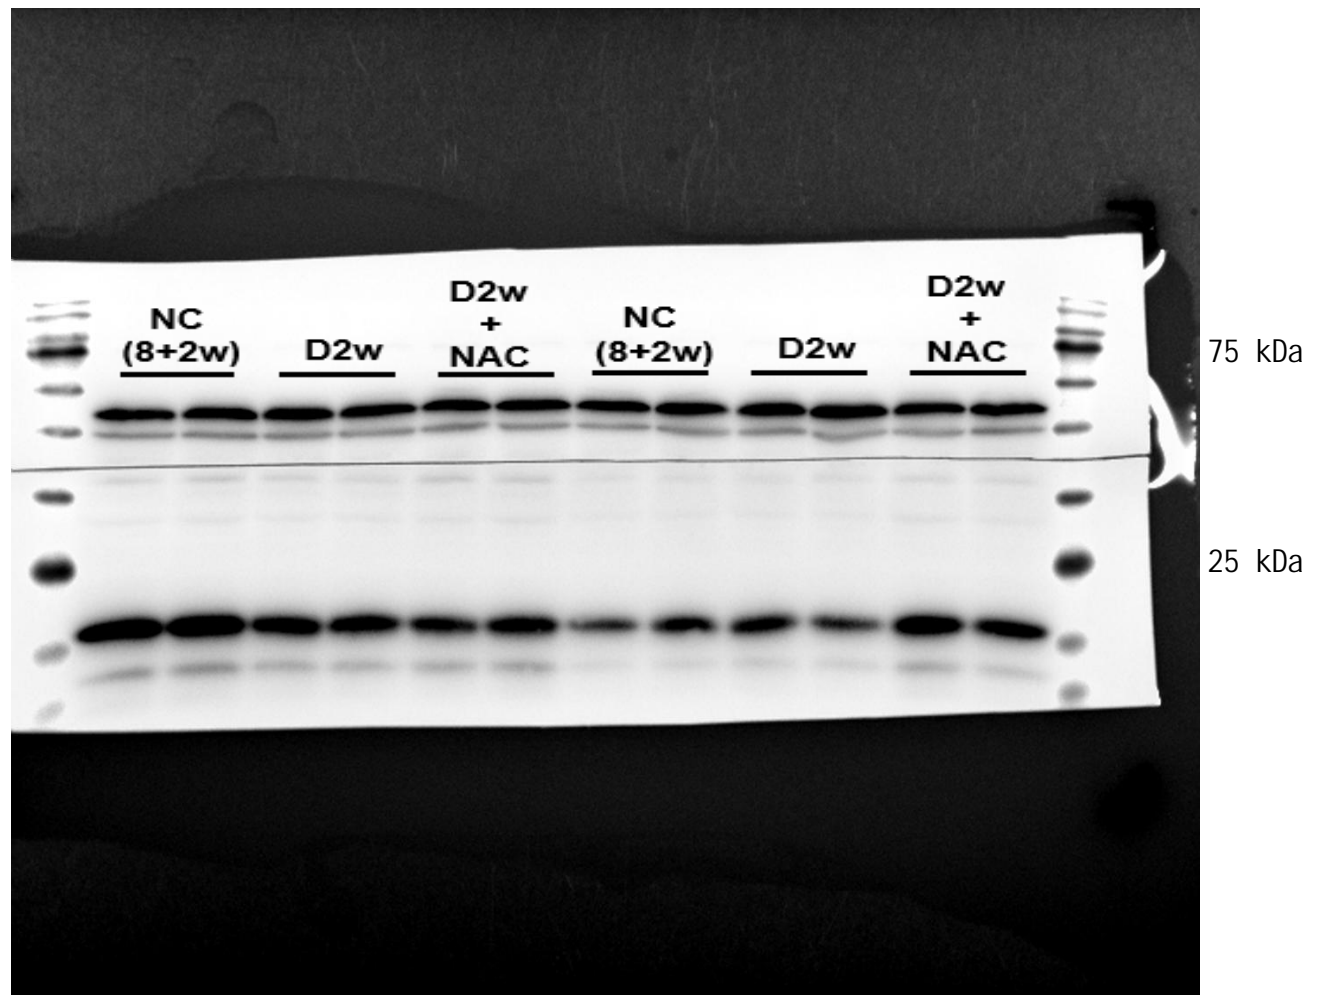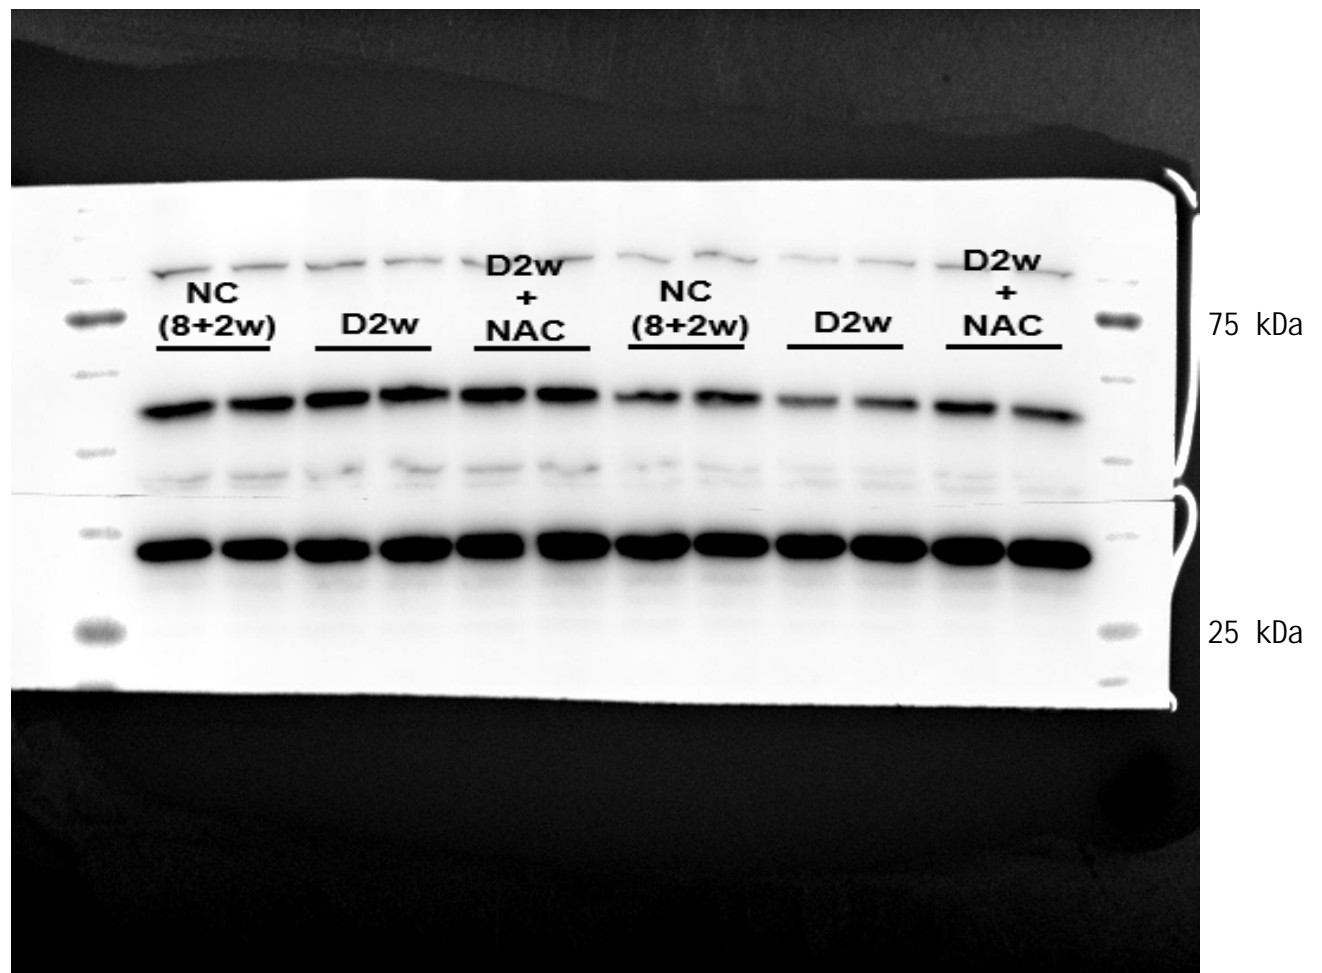

Whole membrane WB image for Gpx4 and Slc7a11 in Figure 4

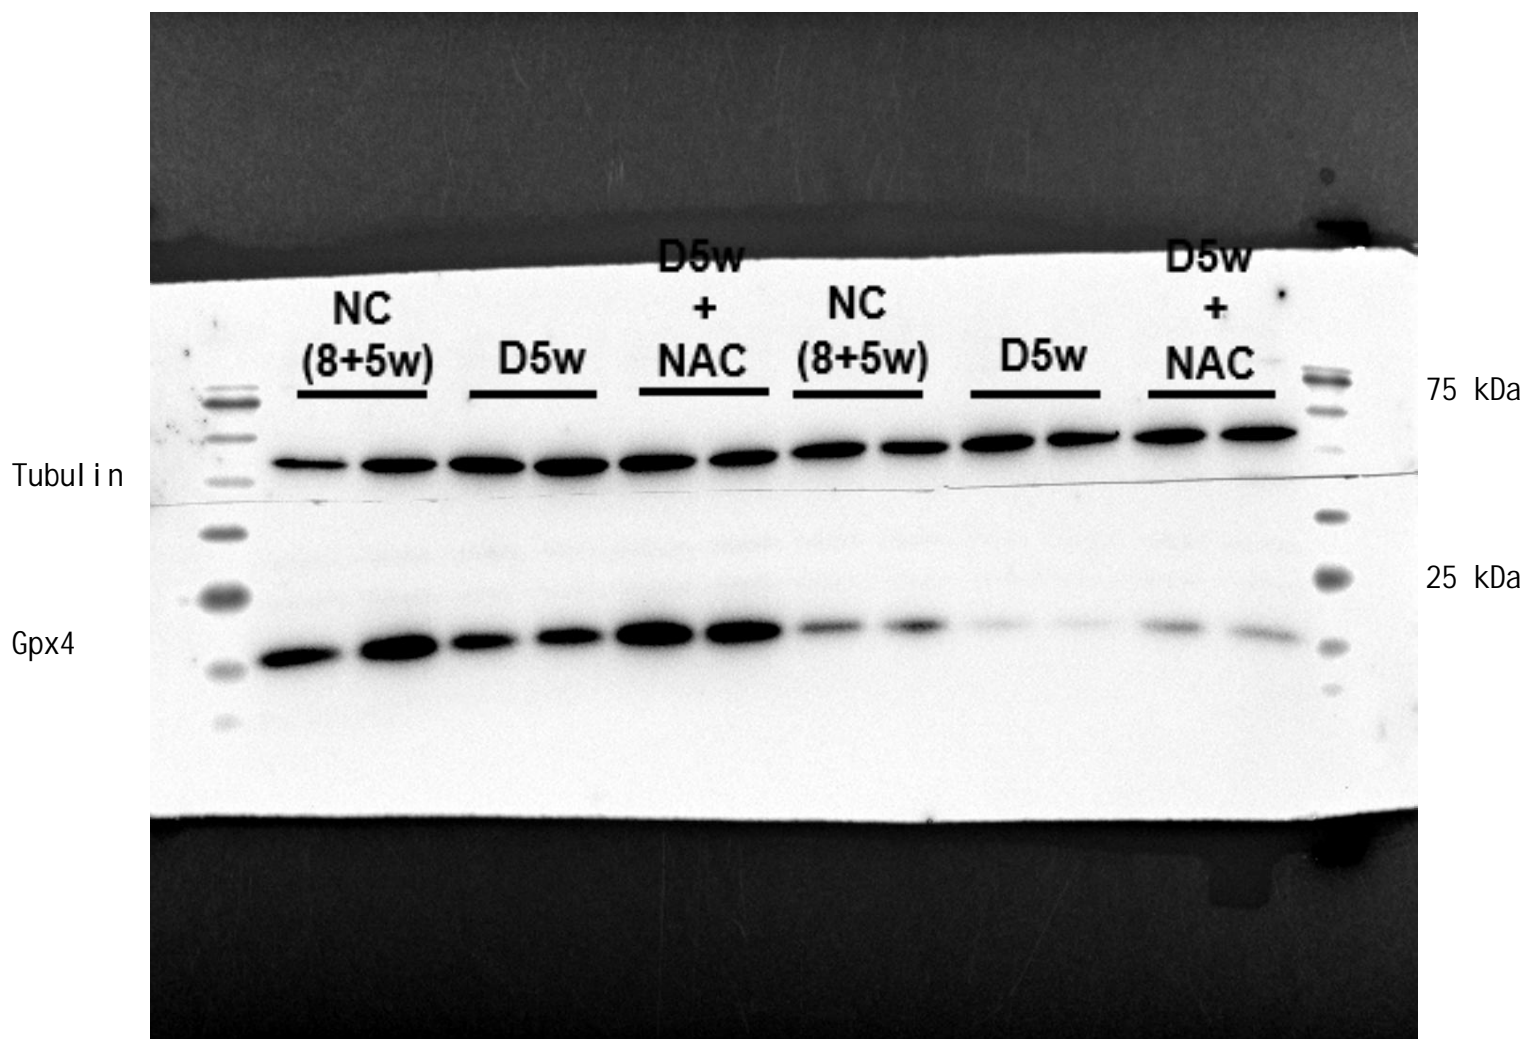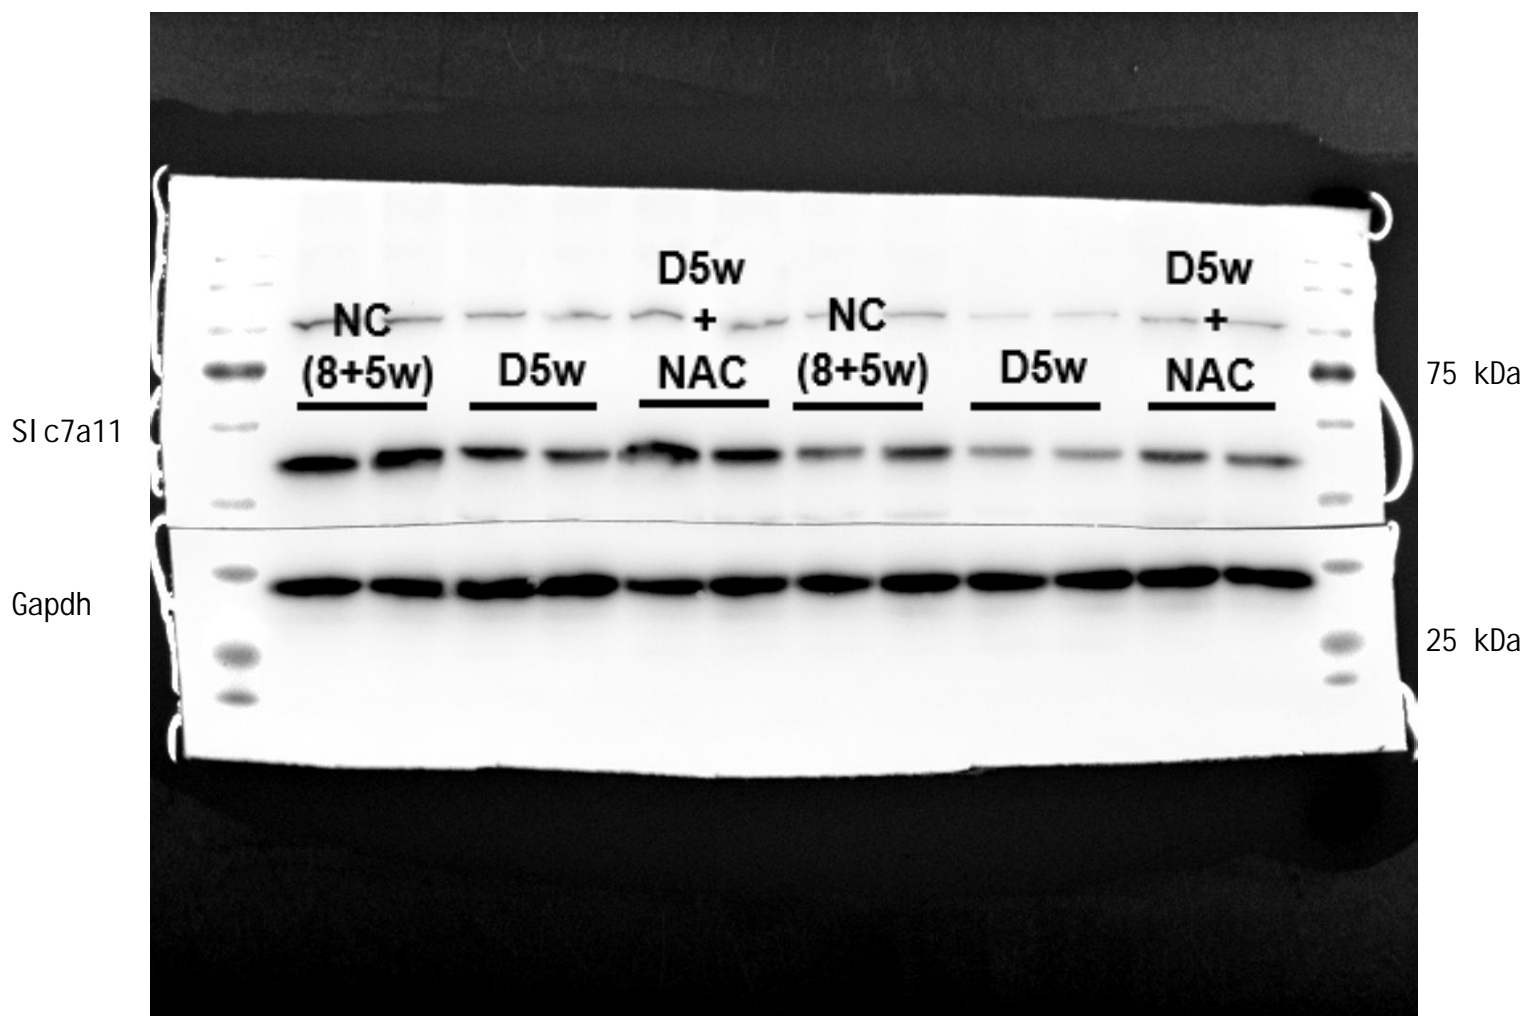

Whole membrane WB image for Ferritin in Supplementary Figure 3

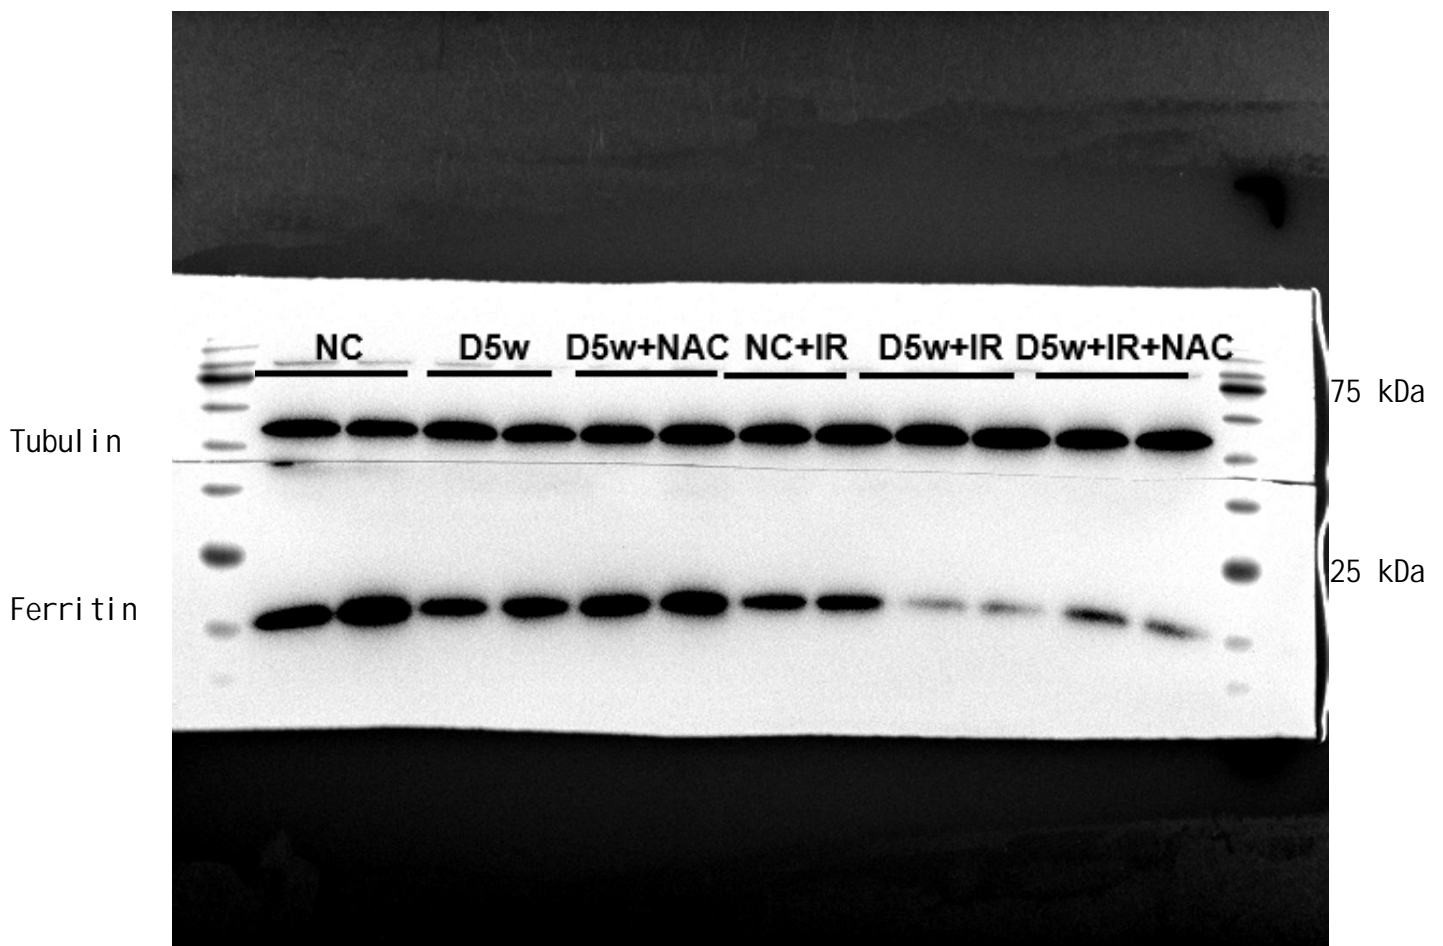

Whole membrane WB image for Gpx4 and Slc7a11 in Supplementary Figure 4

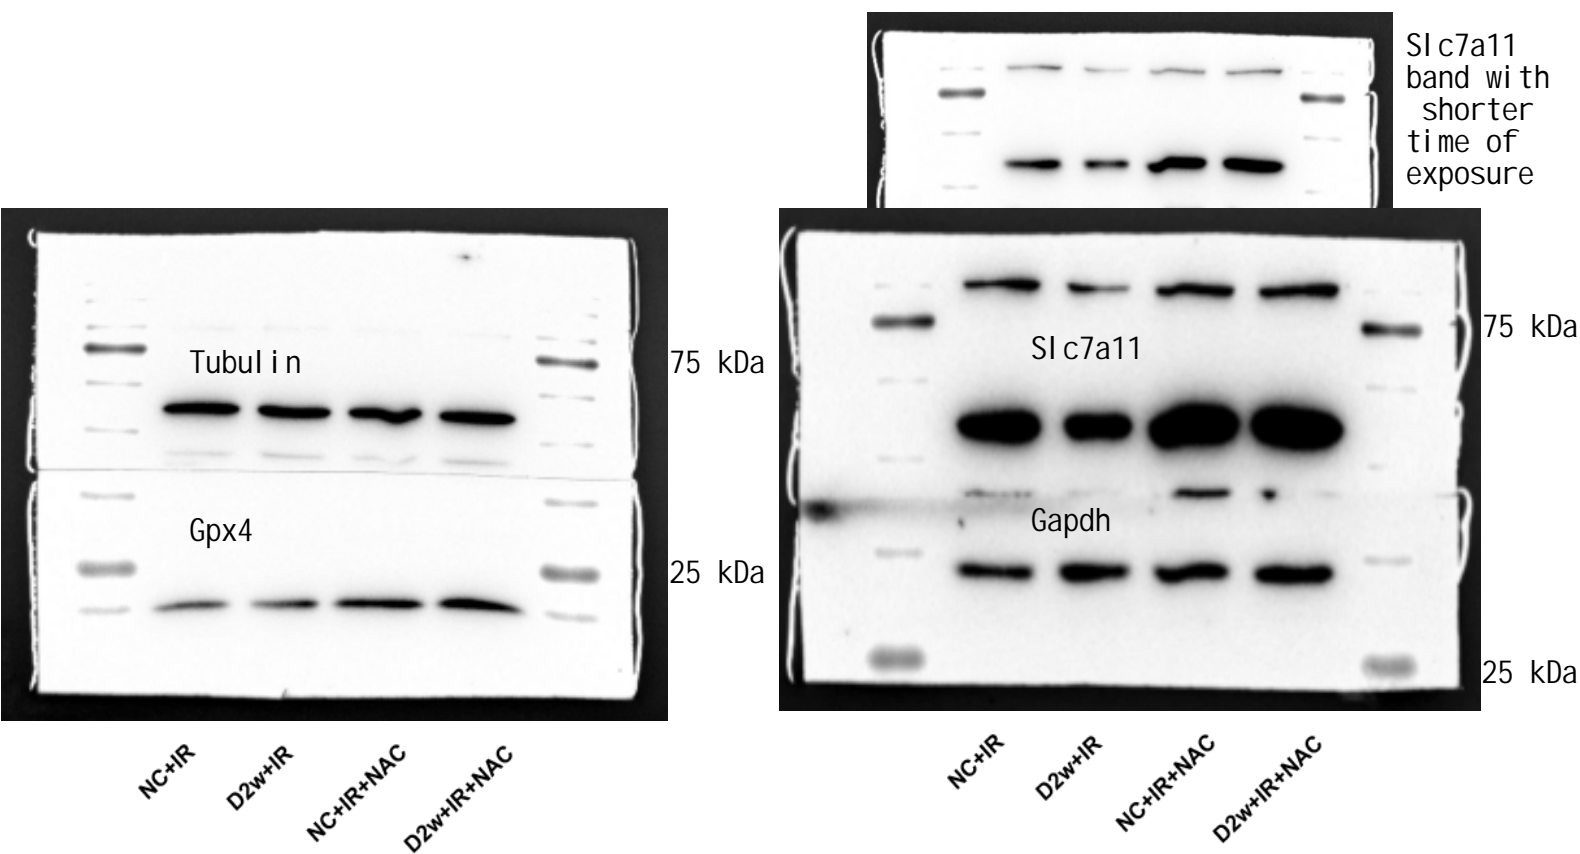

Supplement: 12012_2024_9852_MOESM2_ESM.pdf [file 12012_2024_9852_MOESM2_ESM.pdf]
